# Supplementary material for: Polarized molecular wires for efficient photo-generation of free electric charge carriers
Source: Royal Society of Chemistry journal article supplement (doi:10.1039/d5cp00025d), 2025-01-01
Supplement: d5cp00025d1.pdf [file d5cp00025d1.pdf]

Electronic Supporting Information for

”Polarized molecular wires for efficient photo-generation of free electric charge  
carriers”

Mikolaj Martyka<sup>1</sup> and Joanna Jankowska<sup>\*,1</sup>

<sup>1</sup>Faculty of Chemistry, University of Warsaw, Pasteura 1, Warsaw, 02-093, Poland

## Contents

|                                               |            |
|-----------------------------------------------|------------|
| <b>S1 Active space orbitals of the PMWs</b>   | <b>S2</b>  |
| S1.1 Pyrro-I . . . . .                        | S2         |
| S1.2 Pyrro-II . . . . .                       | S4         |
| S1.3 Isoindole-I . . . . .                    | S5         |
| S1.4 Isoindole-II . . . . .                   | S6         |
| S1.5 Isoindole-I-CC . . . . .                 | S7         |
| <b>S2 ADC2 orbitals of the PMWs</b>           | <b>S9</b>  |
| S2.1 Pyrro-I . . . . .                        | S9         |
| S2.2 Pyrro-II . . . . .                       | S10        |
| S2.3 Isoindole-I . . . . .                    | S11        |
| S2.4 Isoindole-II . . . . .                   | S11        |
| S2.5 Isoindole-I-CC . . . . .                 | S12        |
| <b>S3 HOMO and LUMO energies of the PMWs</b>  | <b>S12</b> |
| <b>S4 Geometrical analysis of pyrro-I</b>     | <b>S13</b> |
| <b>S5 Benchmark ADC(2) calculations</b>       | <b>S14</b> |
| <b>S6 Nuclear ensemble absorption spectra</b> | <b>S16</b> |

## S1 Active space orbitals of the PMWs

### S1.1 Pyrro-I

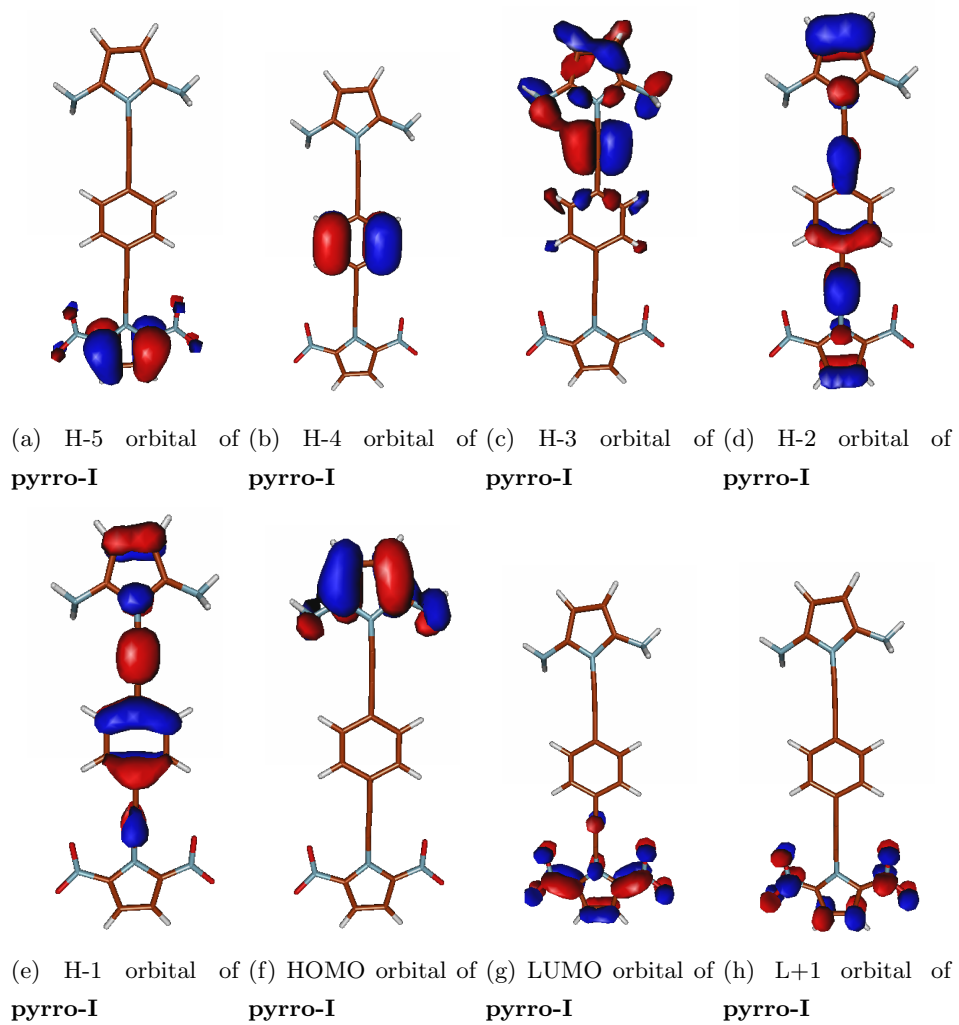

Figure S1: Active space orbitals of **pyrro-I**, used in the ODM2/MRCI-SD calculations.

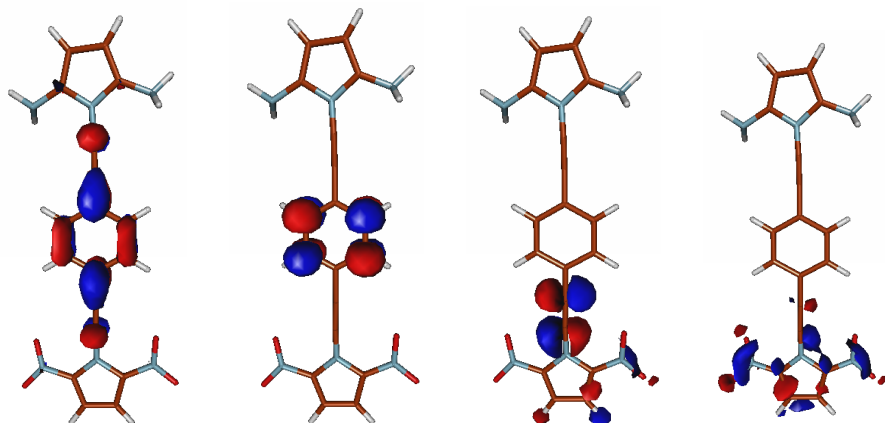

(i) L+2 orbital of pyrro-I (j) L+3 orbital of pyrro-I (k) L+4 orbital of pyrro-I (l) L+5 orbital of pyrro-I

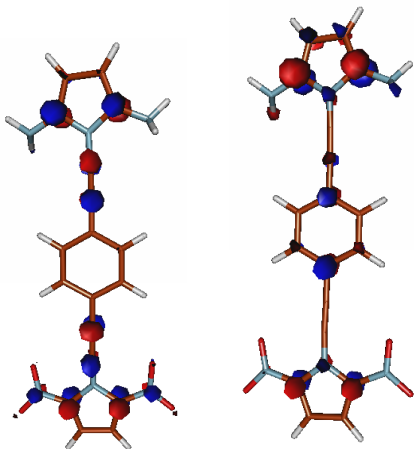

(m) L+6 orbital of pyrro-I (n) L+7 orbital of pyrro-I

## S1.2 Pyrro-II

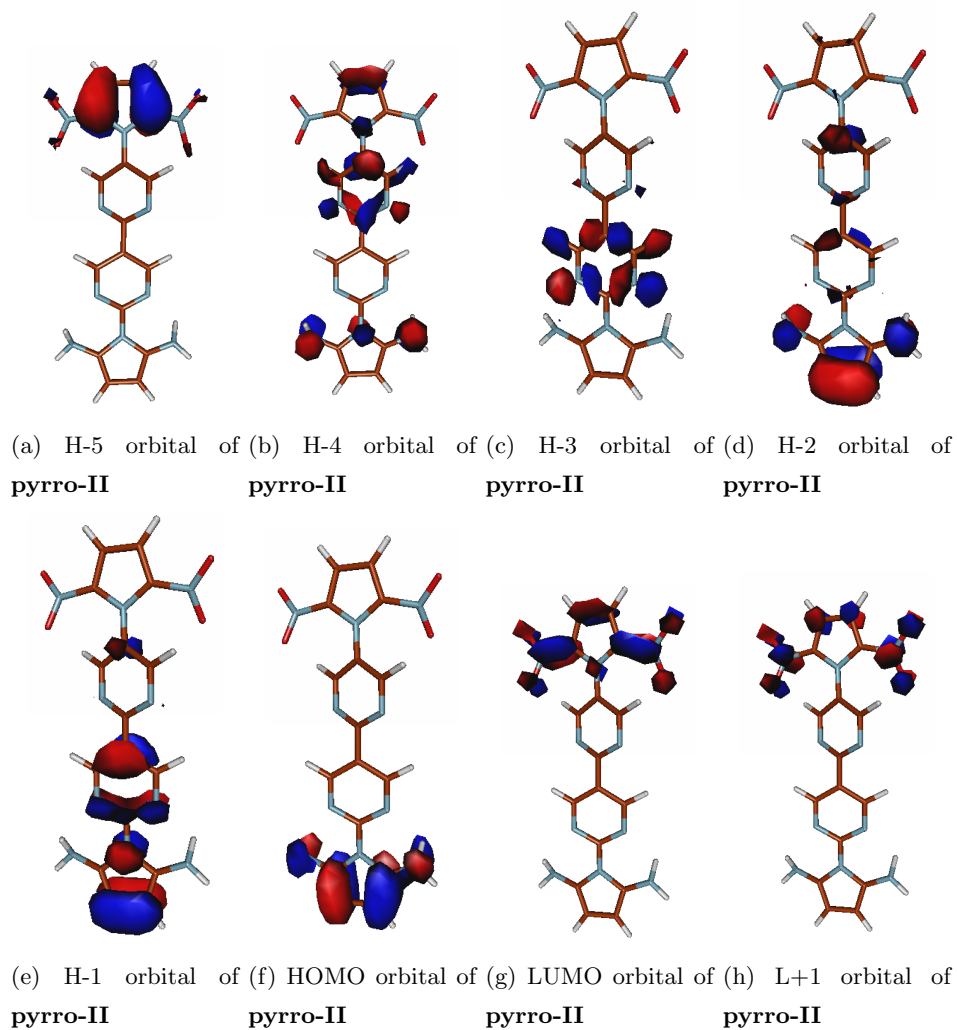

Figure S2: Active space orbitals of **pyrro-II**, used in the ODM2/MRCI-SD calculations.

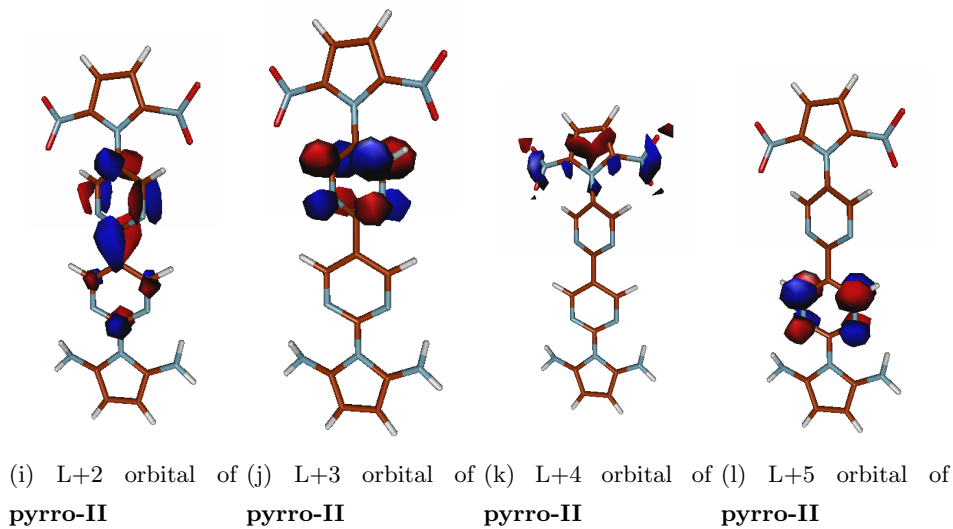

### S1.3 Isoindole-I

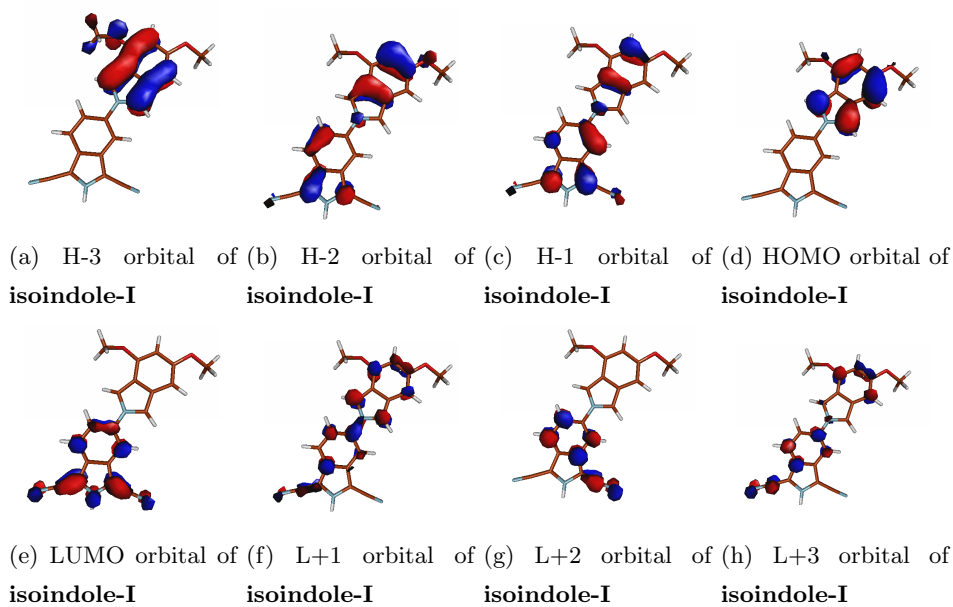

Figure S3: Active space orbitals of **Isoindole-I**, used in the ODM2/MRCI-SD calculations.

## S1.4 Isoindole-II

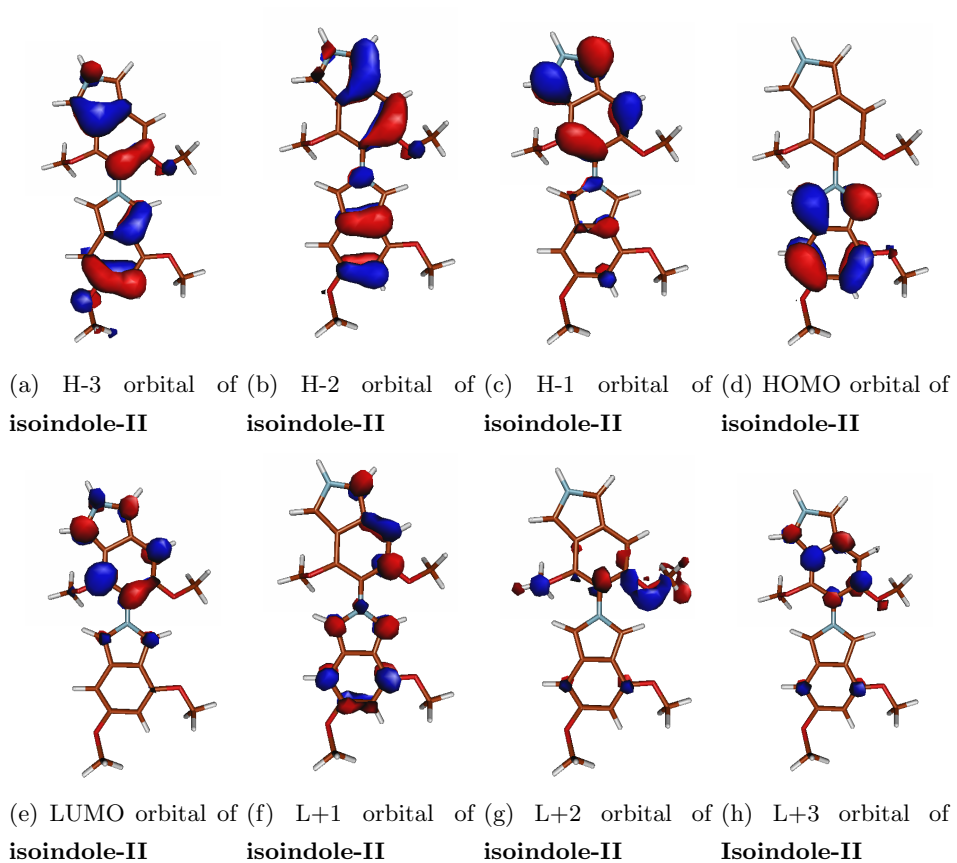

Figure S4: Active space orbitals of **Isoindole-II**, used in the ODM2/MRCI-SD calculations.

## S1.5 Isoindole-I-CC

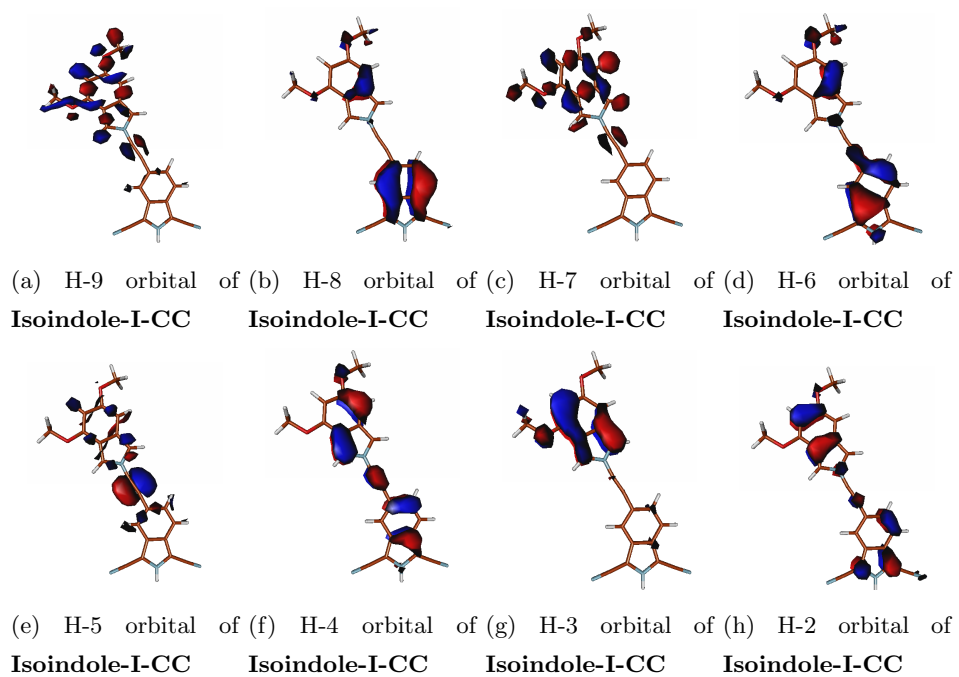

Figure S5: Active space orbitals of **Isoindole-I-CC**, used in the ODM2/MRCI-SD calculations.

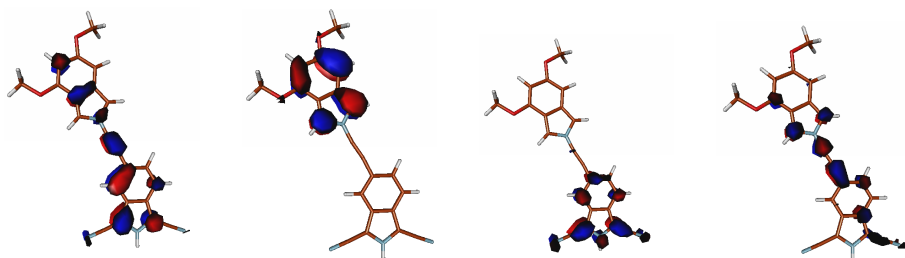

(i) H-1 orbital of Isoindole-I-CC of (j) HOMO orbital of Isoindole-I-CC of (k) LUMO orbital of Isoindole-I-CC of (l) L+1 orbital of Isoindole-I-CC

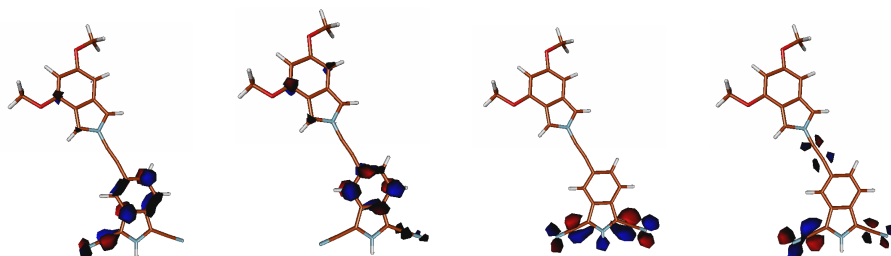

(m) L+2 orbital of Isoindole-I-CC of (n) L+3 orbital of Isoindole-I-CC of (o) L+4 orbital of Isoindole-I-CC of (p) L+5 orbital of Isoindole-I-CC

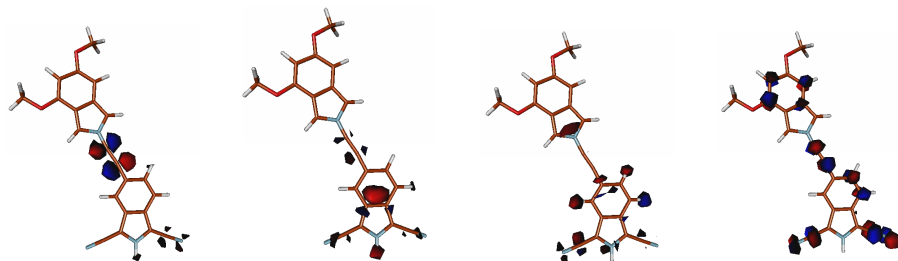

(q) L+6 orbital of Isoindole-I-CC of (r) L+7 orbital of Isoindole-I-CC of (s) L+8 orbital of Isoindole-I-CC of (t) L+9 orbital of Isoindole-I-CC



## S2 ADC2 orbitals of the PMWs

### S2.1 Pyrro-I

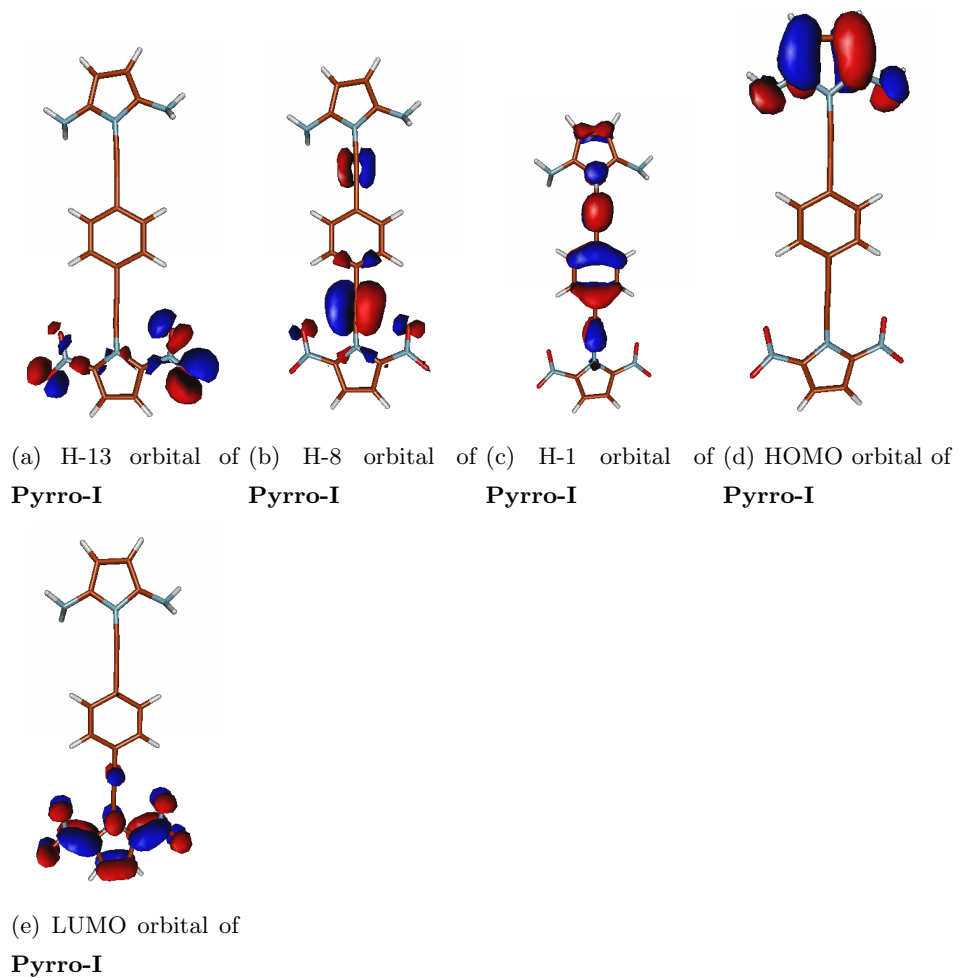

Figure S6: Relevant orbitals of **Pyrro-I**, computed at the ADC(2) level of theory.

## S2.2 Pyrro-II

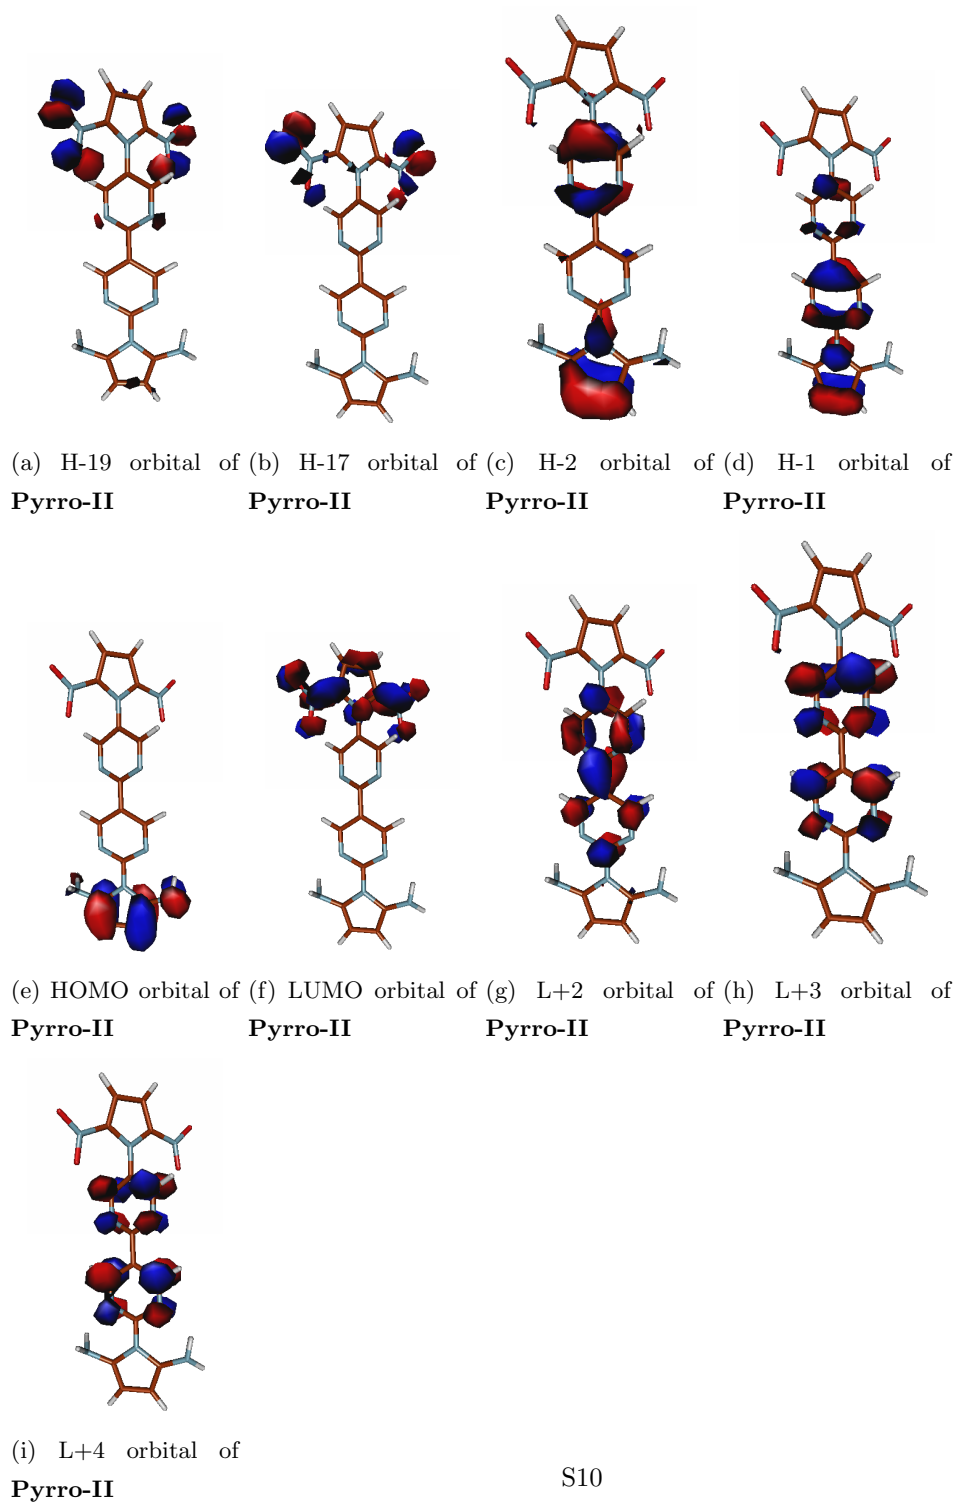

Figure S7: Relevant orbitals of **Pyrro-II**, computed at the ADC(2) level of theory.

### S2.3 Isoindole-I

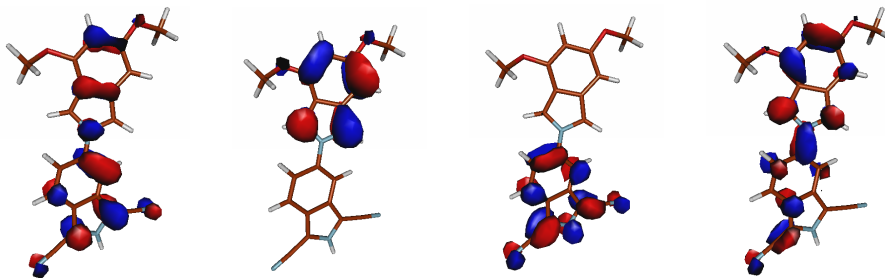

(a) H-1 orbital of (b) HOMO orbital of (c) LUMO orbital of (d) L+1 orbital of  
**Isoindole-I**      **Isoindole-I**      **Isoindole-I**      **Isoindole-I**

Figure S8: Relevant orbitals of **Isoindole-I**, computed at the ADC(2) level of theory.

### S2.4 Isoindole-II

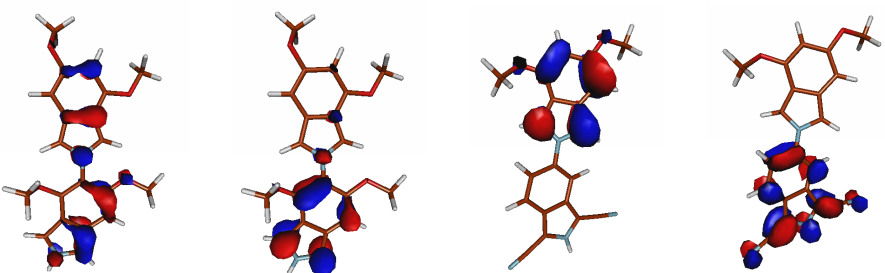

(a) H-2 orbital of (b) H-1 orbital of (c) HOMO orbital of (d) LUMO orbital of  
**Isoindole-II**      **Isoindole-II**      **Isoindole-II**      **Isoindole-II**

Figure S9: Relevant orbitals of **Isoindole-II**, computed at the ADC(2) level of theory.

## S2.5 Isoindole-I-CC

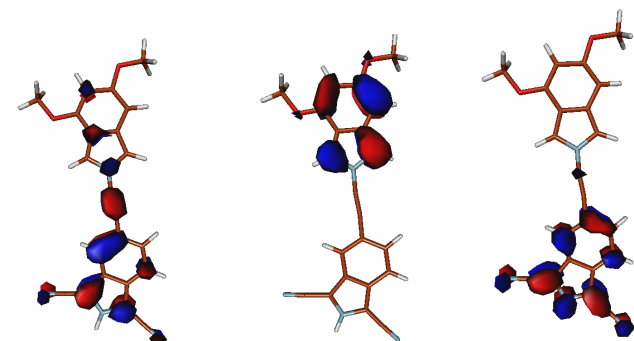

(a) H-1 orbital of (b) HOMO orbital of (c) LUMO orbital of  
Isoindole-I-CC Isoindole-I-CC Isoindole-I-CC

Figure S10: Relevant orbitals of **Isoindole-I-CC**, computed at the ADC(2) level of theory.

## S3 HOMO and LUMO energies of the PMWs

Table S1: HOMO and LUMO energies ( $\epsilon$ ) of the studied **PMWs** determined at the ODM2/MRCI-SD level.

| System                | $\epsilon_{\text{HOMO}}$ (eV) | $\epsilon_{\text{LUMO}}$ (eV) |
|-----------------------|-------------------------------|-------------------------------|
| <b>pyrro-I</b>        | -7.65                         | -1.54                         |
| <b>pyrro-II</b>       | -6.86                         | -1.88                         |
| <b>Isoindole-I</b>    | -7.30                         | -0.79                         |
| <b>Isoindole-II</b>   | -6.53                         | 0.73                          |
| <b>Isoindole-I-CC</b> | -7.21                         | -0.73                         |

## S4 Geometrical analysis of pyrro-I

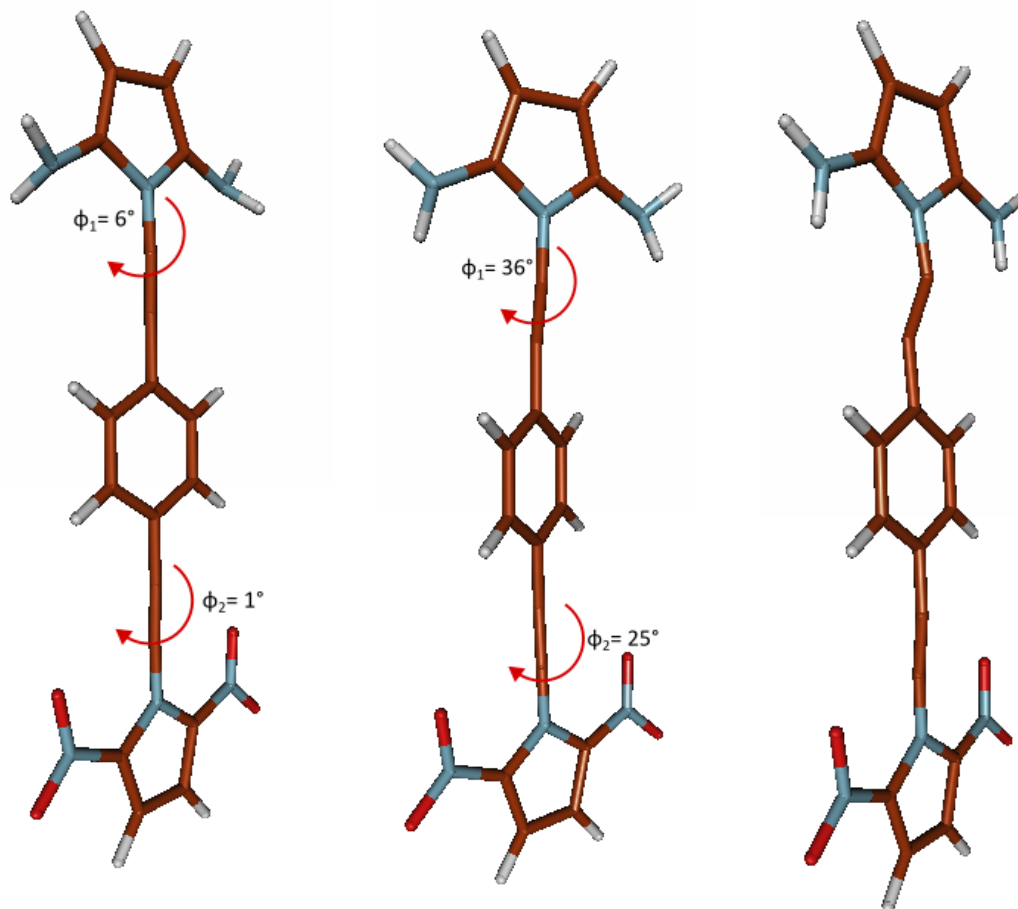

(a) Optimized parallel ground-state minimum of **pyrro-I**. (b) Optimized rotated ground-state minimum of **pyrro-I**. (c) Optimized  $S_1$  minimum of **pyrro-I**.

Figure S11: Optimized structure of ground and excited-state minima of **pyrro-I**.

Table S2:  $S_1$  and  $S_2$  energies and oscillator strengths at the three optimized minima of **pyrro-I**.

| Conformation  | <b>pyrro-I S0-min</b> | <b>pyrro-I S0-min-rot</b> | <b>pyrro-I S1-min</b> |
|---------------|-----------------------|---------------------------|-----------------------|
| $E_{S1}$ (eV) | 3.70                  | 3.59                      | 1.76                  |
| $E_{S2}$ (eV) | 4.01                  | 3.85                      | 2.81                  |
| $f_{S1}$      | 0.3857                | 0.0013                    | 0.0009                |
| $f_{S2}$      | 0.0043                | 0.3774                    | 0.0133                |

## S5 Benchmark ADC(2) calculations

Table S3: ADC(2) vertical excitation energies (E) and wavelengths ( $\lambda$ ), oscillator strengths, excitation characters and state dipole moments of the relevant excited states of **pyrro-I** and **pyrro-II**, along with the leading orbital contributions, computed at the ground-state minima optimized with ODM2/MRCI-SD.

| State           | E/ $\lambda$ [eV/nm] | Excitation character                       | f      | $\mu$ [D] |
|-----------------|----------------------|--------------------------------------------|--------|-----------|
| <b>pyrro-I</b>  |                      |                                            |        |           |
| S1              | 3.20/387             | Mixed CT/LE: H-1-L (86%)                   | 0.6564 | -21.0     |
| S2              | 3.28/378             | Mixed CT/LE: H-8-L (26%), H-14-L (23%)     | 0.0031 | -3.9      |
| S3              | 3.50/3.54            | CT: H-L (86%)                              | 0.0030 | -48.2     |
| <b>pyrro-II</b> |                      |                                            |        |           |
| S1              | 2.54/506             | Mixed CT/LE: H-L+2 (52%), H-L (43%)        | 0.0077 | -24.6     |
| S2              | 3.05/407             | Mixed CT/LE: H-L (53%), H-L+2 (39%)        | 0.0045 | -32.0     |
| S3              | 3.17                 | LE: H-1-L (23%), H-17-L (18%), H-2-L (14%) | 0.0736 | 1.5       |
| S4              | 3.39                 | Mixed CT/LE: H-L+4 (58%), H-L+5 (38%)      | 0.0001 | -12.3     |
| S5              | 3.48                 | LE: H-19-L (49%), H-17-L+1 (19%)           | 0.0003 | 5.7       |

Table S4: ADC(2) vertical excitation energies (E) and wavelengths ( $\lambda$ ), oscillator strengths, excitation characters and state dipole moments of the relevant excited states of **isoindole-I**, **isoindole-II** and **isoindole-I-CC**, computed at the ground-state minima optimized with ODM2/MRCI.

| State                 | E/ $\lambda$ [eV/nm] | Excitation character       | f      | $\mu$ [D] |
|-----------------------|----------------------|----------------------------|--------|-----------|
| <b>Isoindole-I</b>    |                      |                            |        |           |
| S1                    | 3.18/390             | CT: H-L (86%)              | 0.0501 | -21.2     |
| S2                    | 3.80/326             | Mixed CT/LE: H-1-L (79%)   | 0.2275 | -9.8      |
| S3                    | 4.01/309             | Mixed CT/LE: H-L+1 (73%)   | 0.0240 | -10.2     |
| <b>Isoindole-II</b>   |                      |                            |        |           |
| S1                    | 3.66/338             | CT: H-L (88%)              | 0.1089 | -5.5      |
| S2                    | 4.09/303             | LE: H-1-L (87%)            | 0.1625 | 9.7       |
| S3                    | 4.30/288             | Mixed CT/LE: H-2-L (79%)   | 0.3279 | 6.4       |
| <b>Isoindole-I-CC</b> |                      |                            |        |           |
| S1                    | 3.59/349             | CT: H-L (62%), H-1-L (23%) | 0.1760 | -25.5     |
| S2                    | 3.93/315             | Mixed CT/LE: H-1-L (79%)   | 0.3508 | -14.1     |

Table S5:  $S_0$ - $S_1$  energy gap ( $\Delta E$ ),  $S_0$ - $S_1$  oscillator strengths (f) and the  $S_1$  excitation character computed at the ODM2/MRCI-optimized  $S_1$  geometries of all studied systems, at the ADC(2) level of theory.

| PMW                   | $\Delta E_{S_0-S_1}$ [eV] | f      | $S_1$ character |
|-----------------------|---------------------------|--------|-----------------|
| <b>pyrro-I</b>        | 1.15                      | 0.0009 | H-L (78 %)      |
| <b>pyrro-II</b>       | 0.15                      | 0.0000 | H-L (88 %)      |
| <b>isoindole-I</b>    | 2.52                      | 0.0673 | H-L (91%)       |
| <b>isoindole-II</b>   | 2.77                      | 0.0616 | H-L (94 %)      |
| <b>isoindole-I-CC</b> | 1.26                      | 0.0196 | H-L (88 %)      |

## S6 Nuclear ensemble absorption spectra

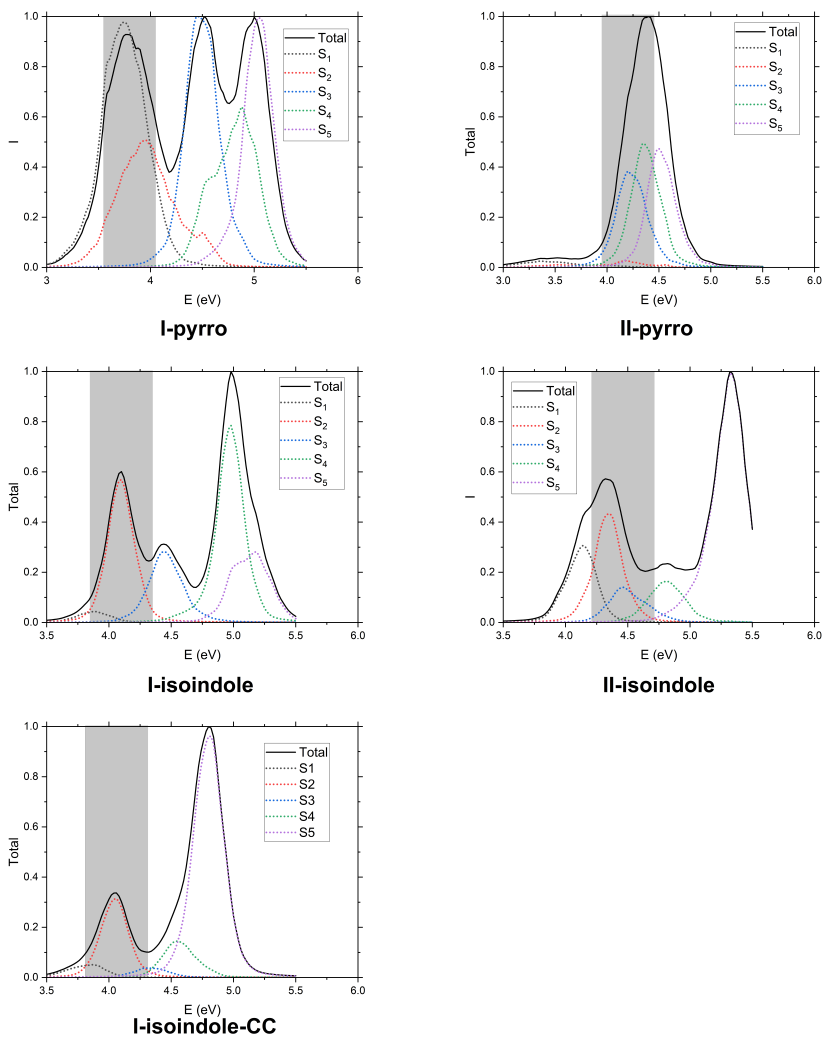

Figure S12: Nuclear ensemble absorption spectra of the studied systems. Full black line denote the total simulated absorption spectrum, while dotted lines represent contributions from transitions to given adiabatic states. The contributions from states S<sub>1</sub> to S<sub>5</sub> have been marked black, red, blue, green and violet lines, respectively.
